# Supplementary material
Source: publisher figshare collection journal article supplement (https://karger.figshare.com/ndownloader/files/27958824)

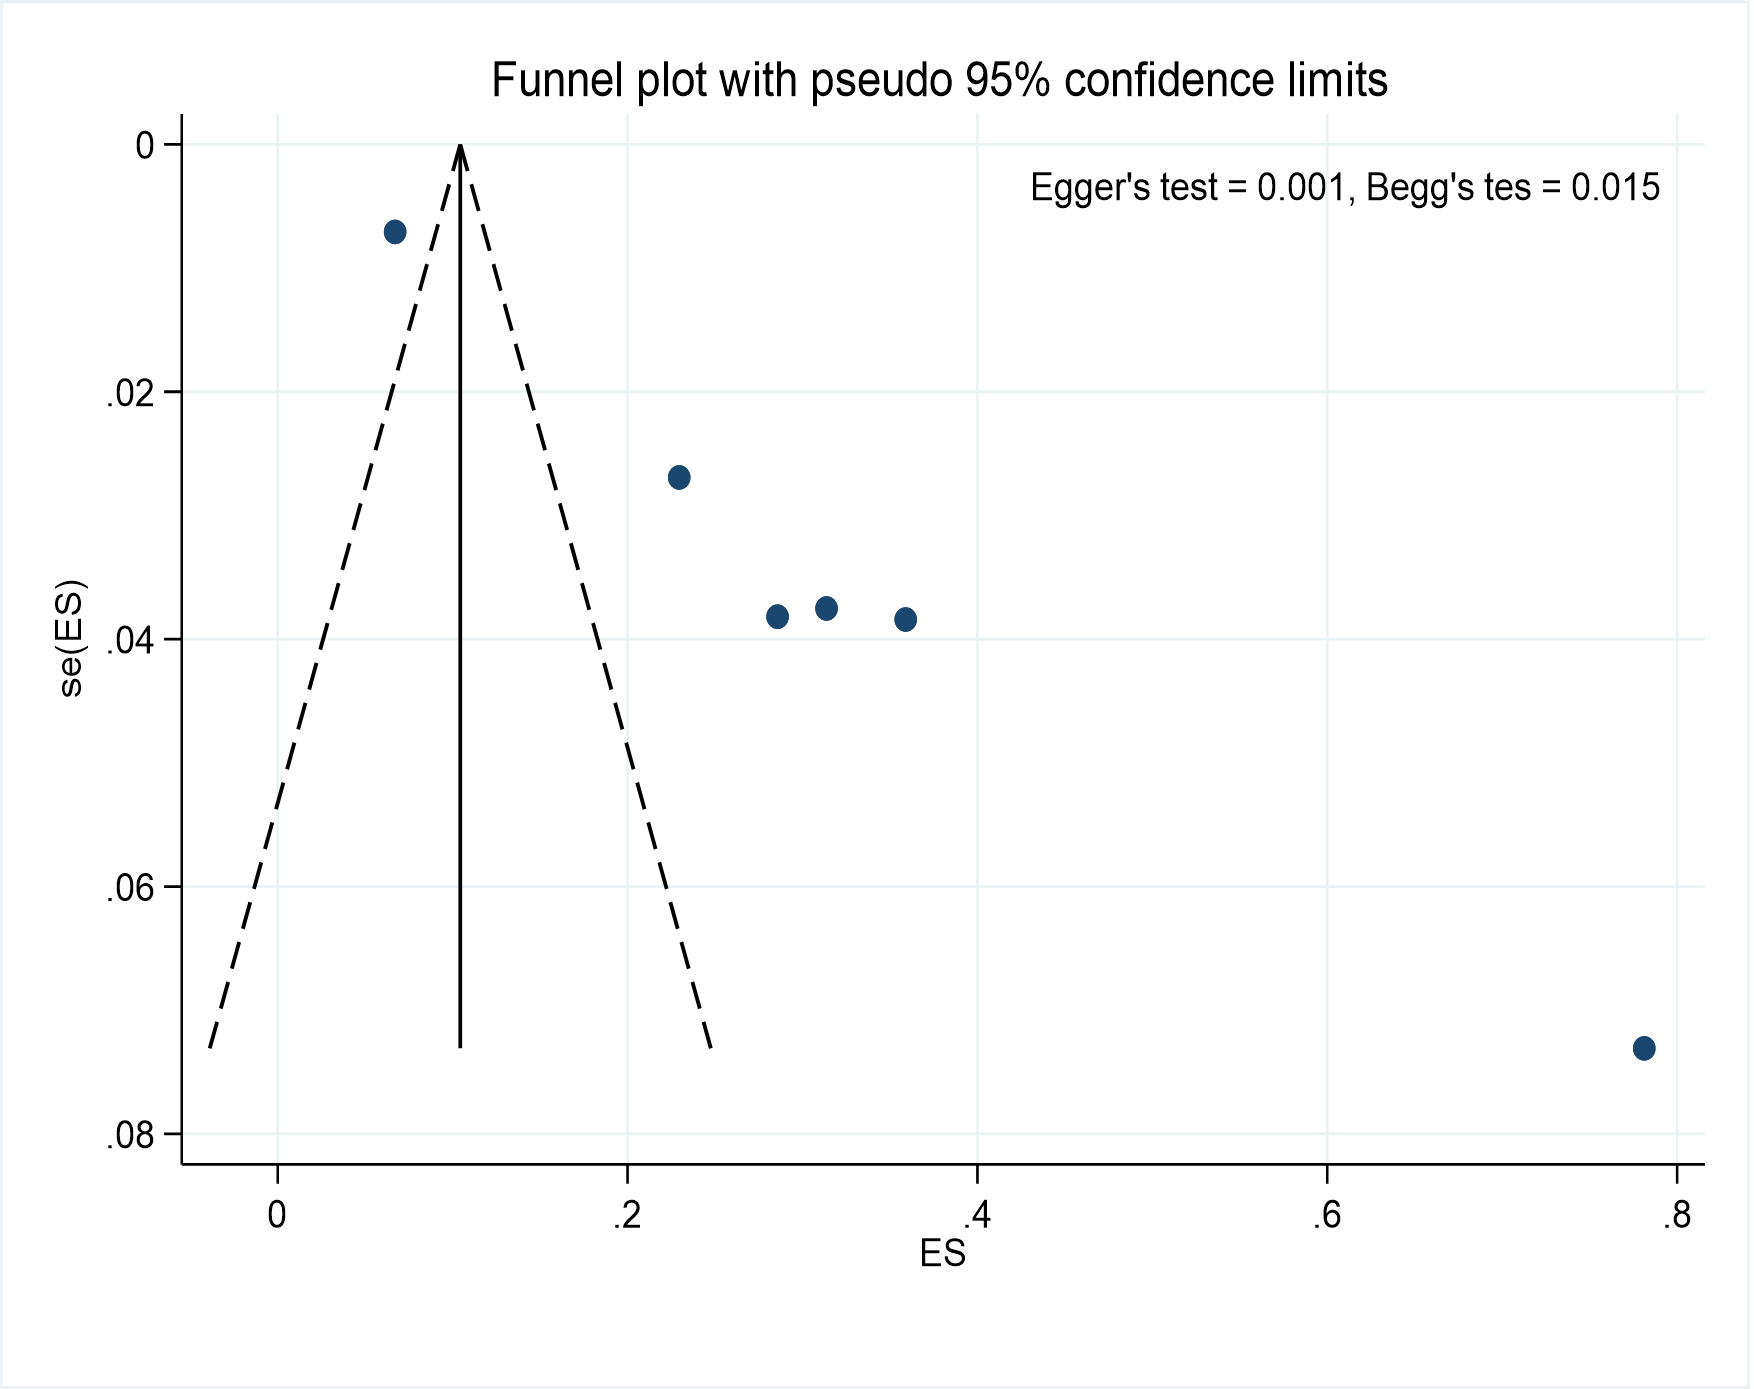


**Supplementary Figure 2:** Polypharmacy in the older population [31,33,34,35,36,37]

Supplement: Supplementary file 1 [file 27958824]
